# Supplementary material for: Random terpolymer based on thiophene-thiazolothiazole unit enabling efficient non-fullerene organic solar cells
Source: PubMed Central journal article supplement (PMC7490407; doi:10.1038/s41467-020-18378-9), 2020-09-14
Supplement: 41467_2020_18378_MOESM1_ESM.pdf [file 41467_2020_18378_MOESM1_ESM.pdf]

## SUPPLEMENTARY INFORMATION

### **Random Terpolymer Based on Thiophene-Thiazolothiazole Unit Enabling Efficient Non-Fullerene Organic Solar Cells**

Jingnan Wu<sup>1</sup>, Guangwei Li<sup>1</sup>, Jin Fang<sup>1</sup>, Xia Guo<sup>1</sup>, Lei Zhu<sup>2</sup>, Bing Guo<sup>1</sup>, Yulong Wang<sup>1</sup>, Guangye Zhang<sup>3</sup>, Lingeswaran Arunagiri<sup>4</sup>, Feng Liu<sup>2</sup>, He Yan<sup>\*4</sup>, Maojie Zhang<sup>\*1</sup>, Yongfang Li<sup>1,5</sup>

<sup>1</sup> Laboratory of Advanced Optoelectronic Materials, College of Chemistry, Chemical Engineering and Materials Science, Soochow University, Suzhou 215123, China.

<sup>2</sup> Department of Physics and Astronomy and Collaborative Innovation Center of IFSA (CICIFSA), Shanghai Jiao Tong University, Shanghai 200240, China.

<sup>3</sup> Flat/RM B, 12/F, Hang Seng Causeway Bay BLDG, 28 Yee Wo Street, Causeway Bay, Hong Kong.

<sup>4</sup> Department of Chemistry and Hong Kong Branch of Chinese National Engineering Research Center for Tissue Restoration & Reconstruction, Hong Kong University of Science and Technology (HKUST), Clear Water Bay, Kowloon, Hong Kong, China.

<sup>5</sup> Beijing National Laboratory for Molecular Sciences, CAS Key Laboratory of Organic Solids, Institute of Chemistry, Chinese Academy of Sciences, Beijing 100190, China.

\*Email: [mjzhang@suda.edu.cn](mailto:mjzhang@suda.edu.cn); [hyan@ust.hk](mailto:hyan@ust.hk)

Figure S.1 | Synthetic scheme for the polymers and chemical structure of Y6.

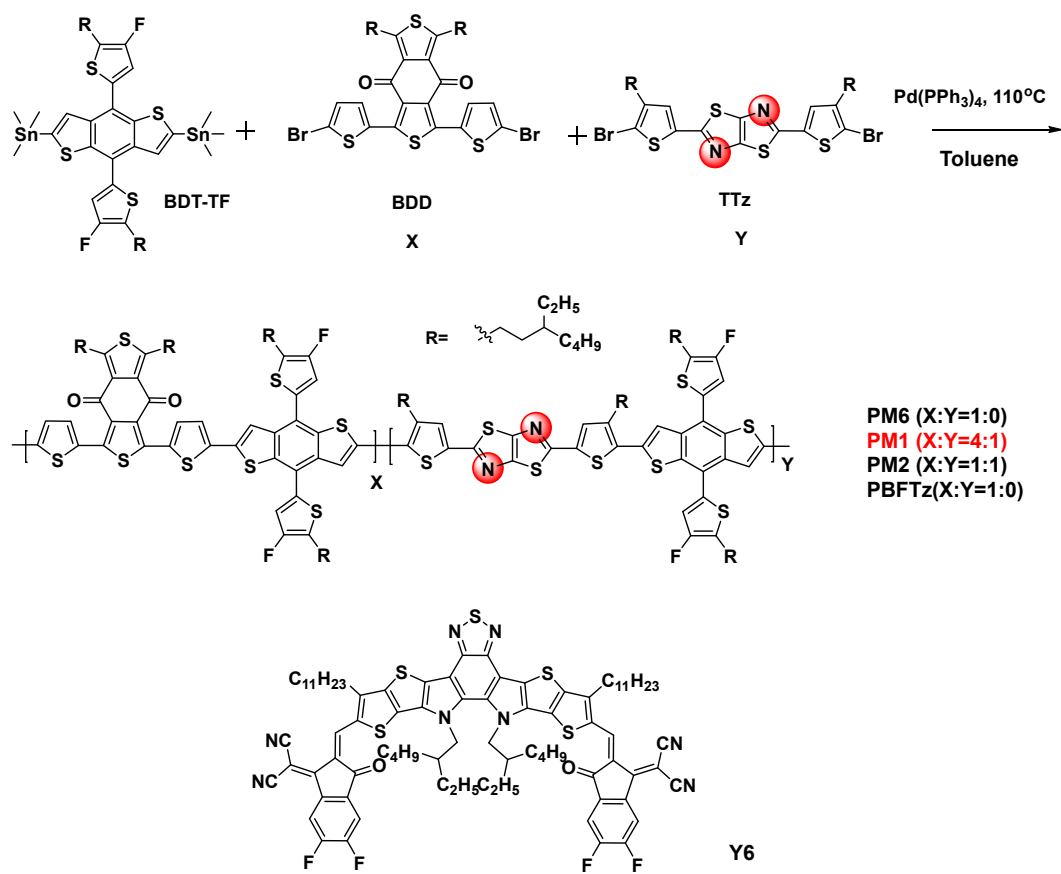

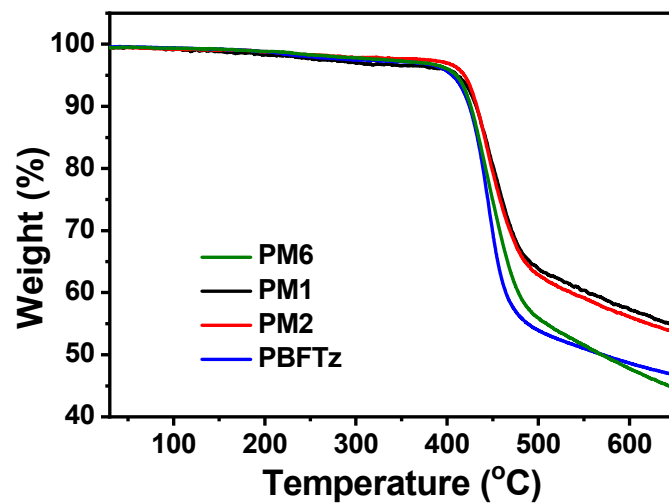

Figure S.2 | TGA analysis (heating ramp:  $10\text{ }^{\circ}\text{C min}^{-1}$ ) of polymers in nitrogen.

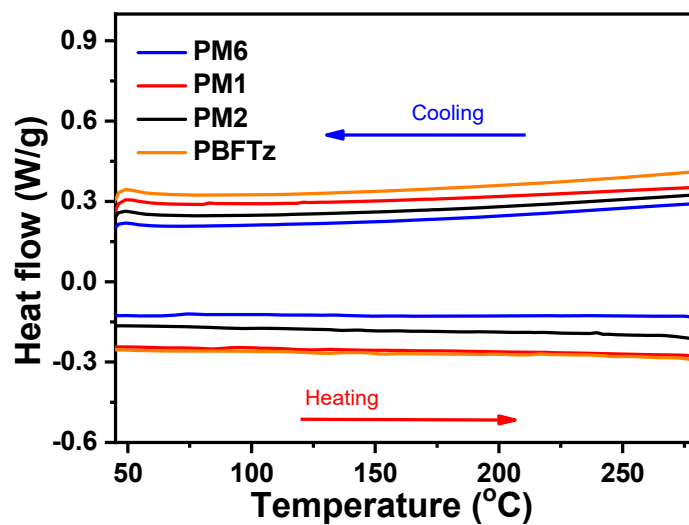

Figure S.3 | DSC curves of polymers at a scan rate of  $10\text{ }^{\circ}\text{C min}^{-1}$  under nitrogen.

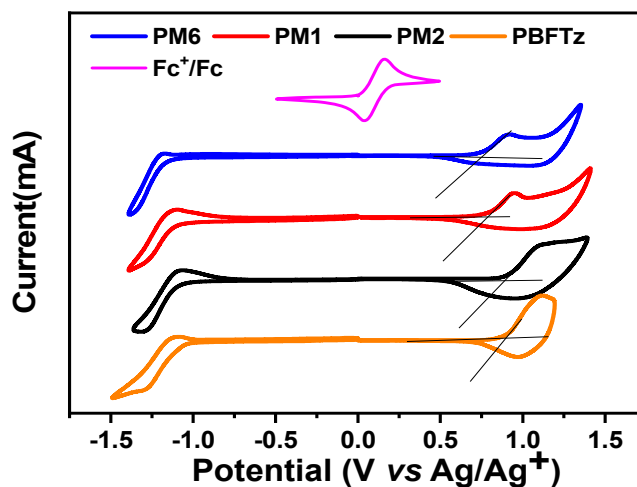

Figure S.4 | Cyclic voltammograms of polymers. Cyclic voltammetry (CV) was performed on a Zahner Zennium IM6 electrochemical workstation with a three-electrode system in 0.1 mol L<sup>-1</sup> Bu<sub>4</sub>NPF<sub>6</sub> acetonitrile solutions at a scan rate of 50 mV s<sup>-1</sup>. The three-electrode system included glassy carbon disk, platinum wire and Ag/Ag<sup>+</sup> electrode as the working electrode, counter electrode and reference electrode, respectively. The potential of the Ag/Ag<sup>+</sup> reference electrode was internally calibrated by using the ferrocene/ferrocenium redox couple (Fc/Fc<sup>+</sup>), and the Ag/Ag<sup>+</sup> reference electrode possessed an energy level of 4.73 eV.

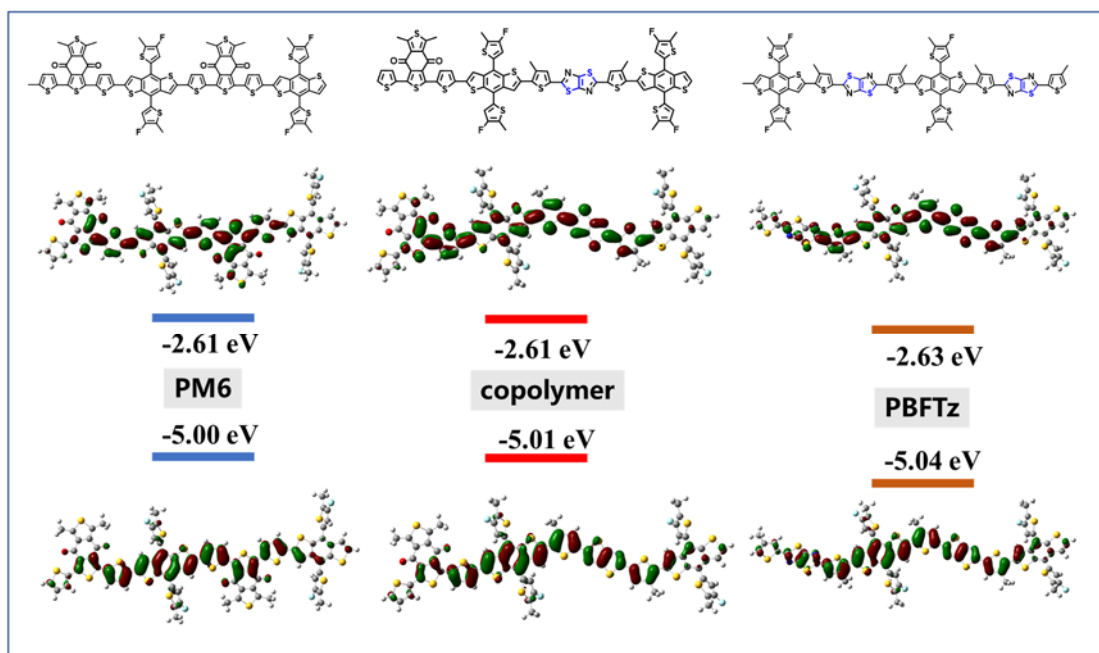

Figure S.5 | Molecular energy levels and wavefunction distributions of the frontier orbitals for by polymer models calculated by DFT/B3LYP/6-31G (d, p) with methyl groups in replacing alkyl substituents to simplify the calculations.

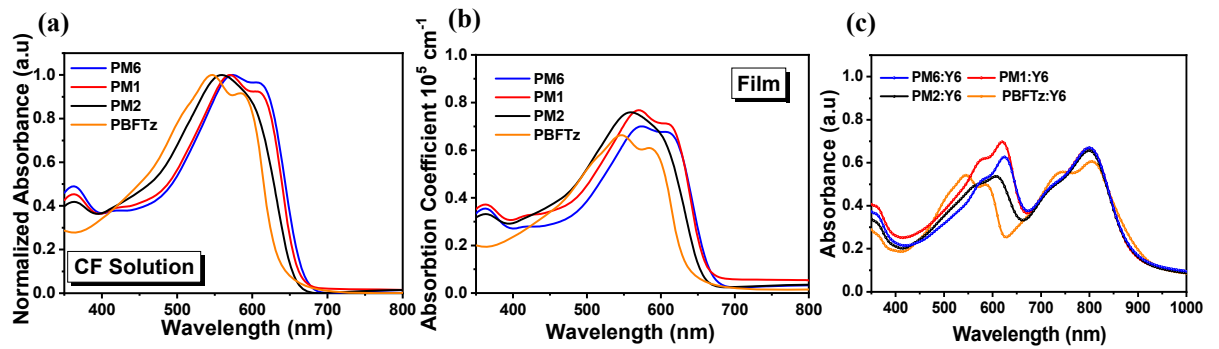

Figure S.6 | (a) Normalized absorption spectra of polymers in chloroform. (b) the absorption coefficients of neat polymer films (c) UV-vis absorption spectra of the polymer:Y6 blend films. UV-vis absorption spectrum was recorded on a UV-Vis-NIR Spectrophotometer of Agilent Technologies Cary Series, in which the extinction coefficient was defined by the absorption intensity of the active layer with a thick of 1 cm (ca. 100 nm for blends).

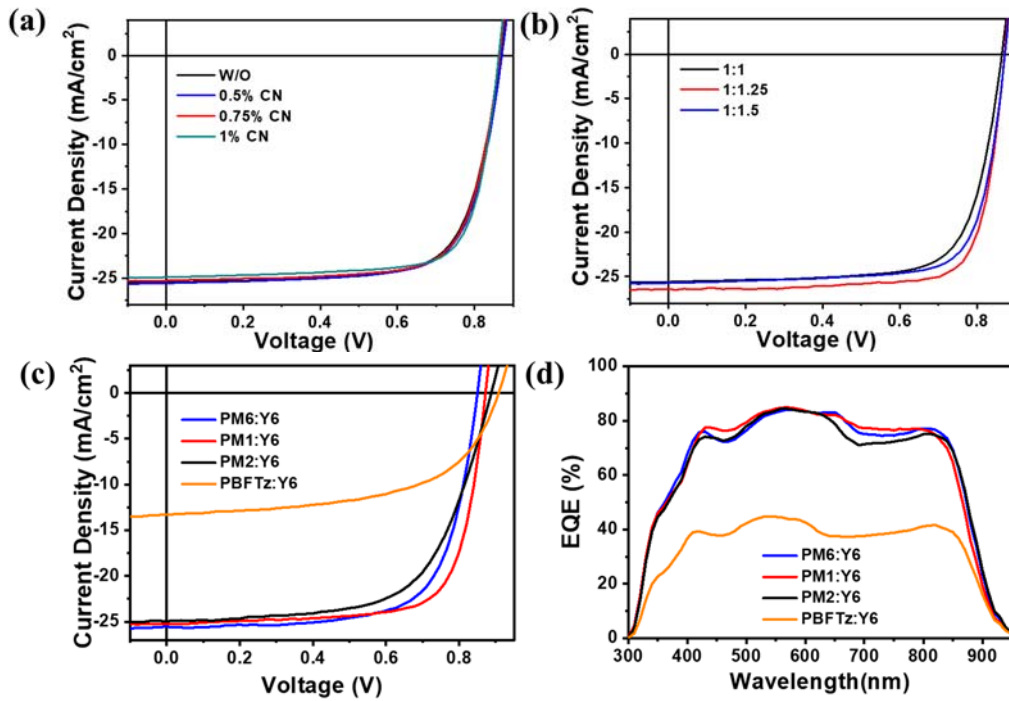

Figure S.7 | The  $J$ - $V$  characteristics of (a) the OSCs based on PM1:Y6 at different additive. (b) the OSCs based on PM1:Y6 at different D/A weight ratios with additive (0.75 vol %); and (c) the OSCs based on as-cast device under the irradiation of AM 1.5G, 100 mW/cm<sup>2</sup>. (d) the EQE spectra of the OSCs.

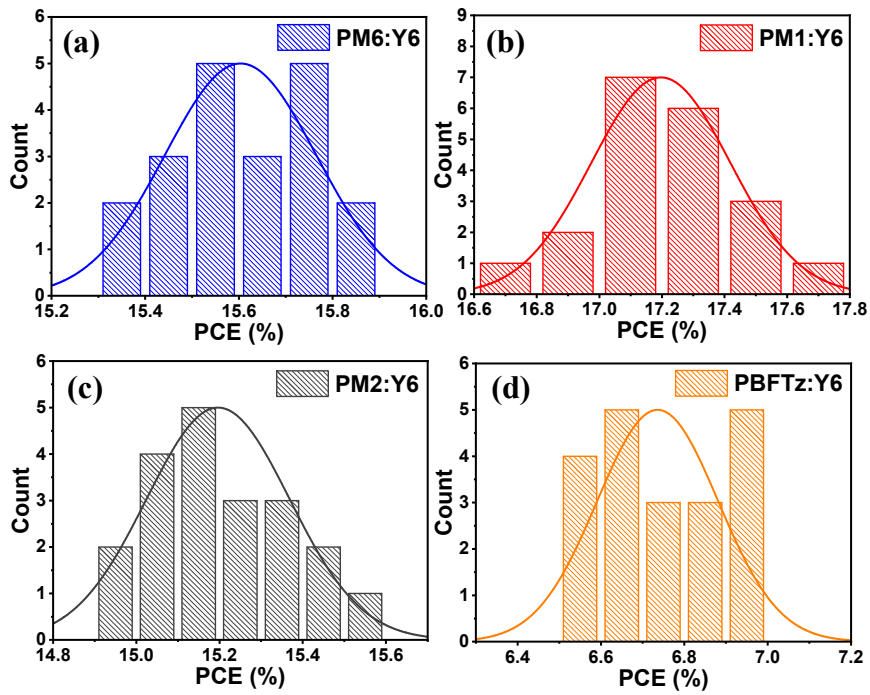

Figure S.8 | Statistical diagram of PCEs for 20 polymer:Y6-based cells.



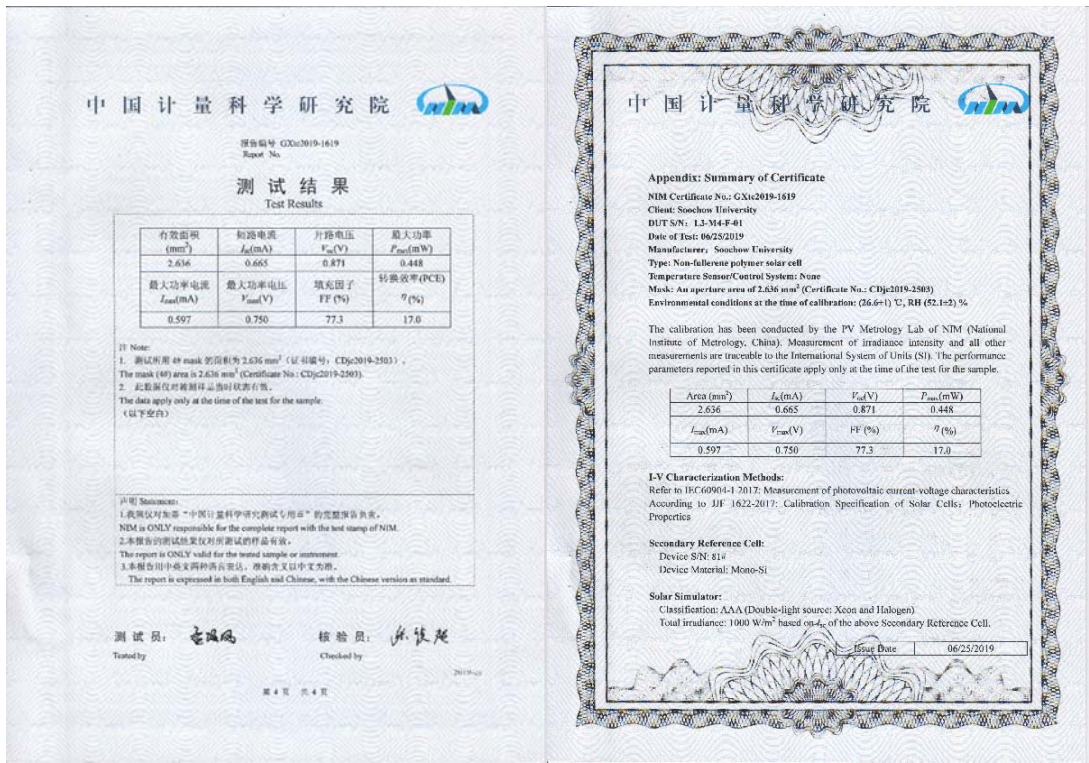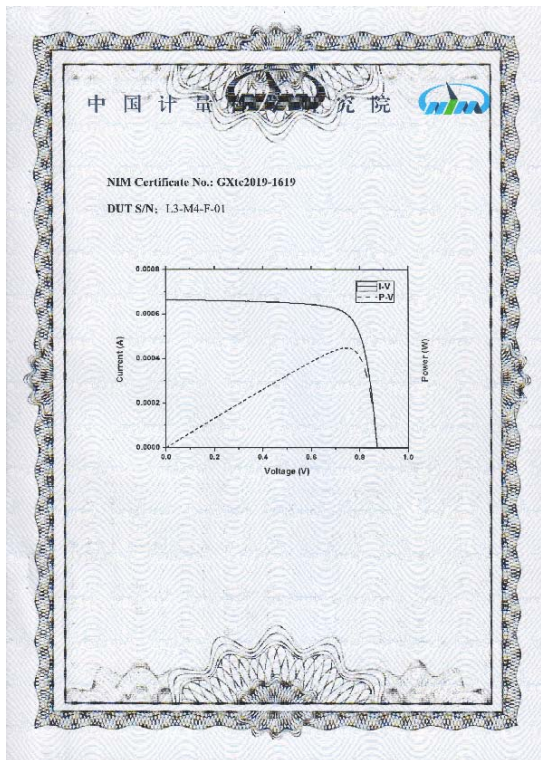

Figure S.9 | Test report of the PM1:Y6-based OSCs from National Institute of Metrology, China (NIM).

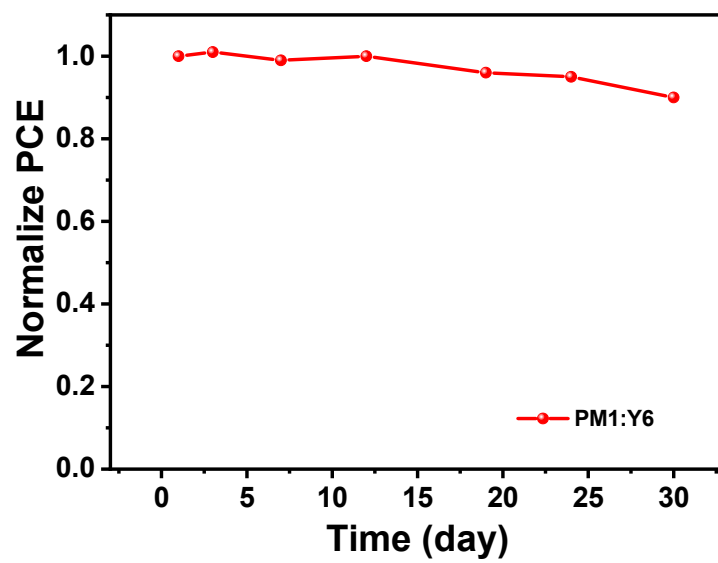

Figure S.10 | Storage stability of the optimized PM1:Y6 devices.

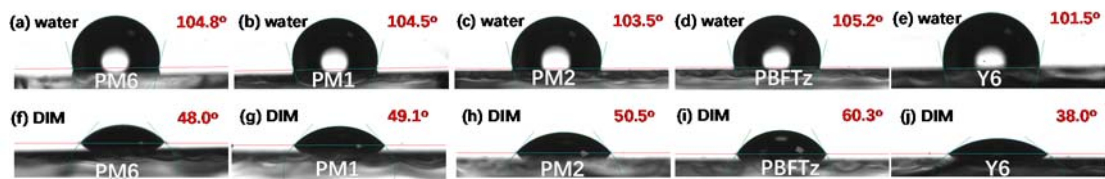

Figure S.11 | Water and diiodomethane (DIM) contact angles of the pristine polymers.

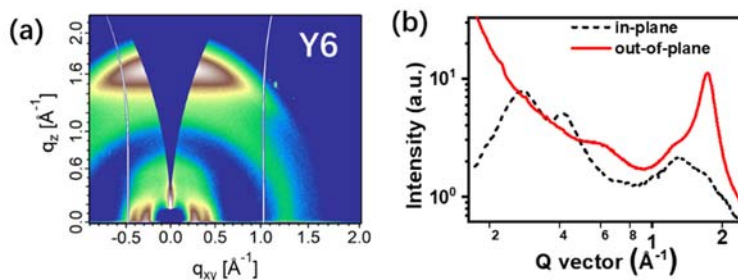

Figure S.12 | (a) 2D GIWAXS patterns for Y6 pure films. (b) Scattering profiles for pure films of Y6.

Grazing incidence wide-angle X-ray scattering measurements were performed at beamline 7.3.3 at the Advanced Light Source.<sup>1</sup> Samples were prepared on Si substrates using identical blend solutions as those used in devices. The 10 keV X-ray beam was incident at a grazing angle of 0.12°-0.16°, selected to maximize the scattering intensity from the samples. The crystal coherence length (CCL) was defined as  $CCL = 0.9 \times (2\pi/\text{FWHM}) (\text{\AA})$ , where FWHM is the full width at half maximum of the corresponding diffraction peak.

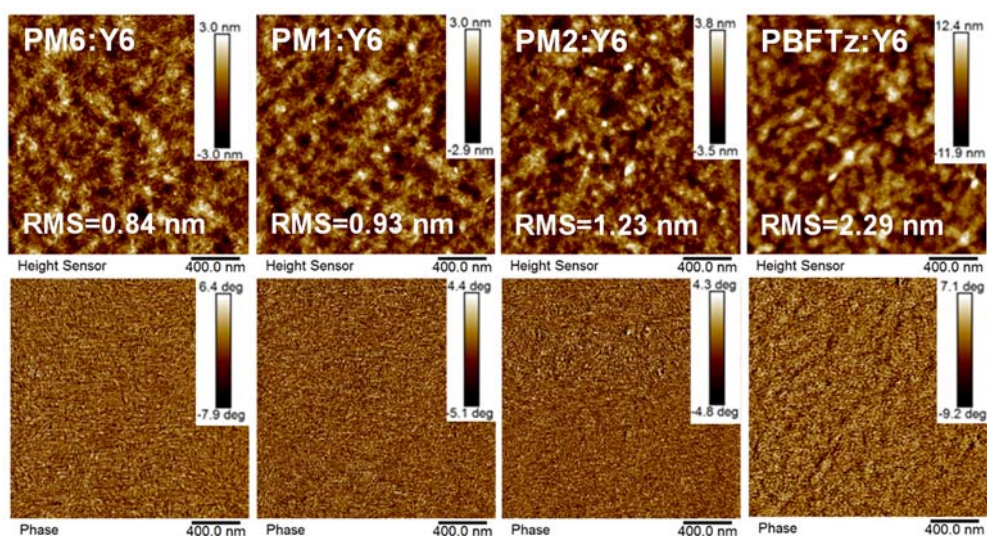

Figure S.13 | The AFM images of different blend films under the optimal conditions.

Atomic force microscopy (AFM) measurements were performed on a Dimension 3100 (Veeco) Atomic Force Microscope in the tapping mode.

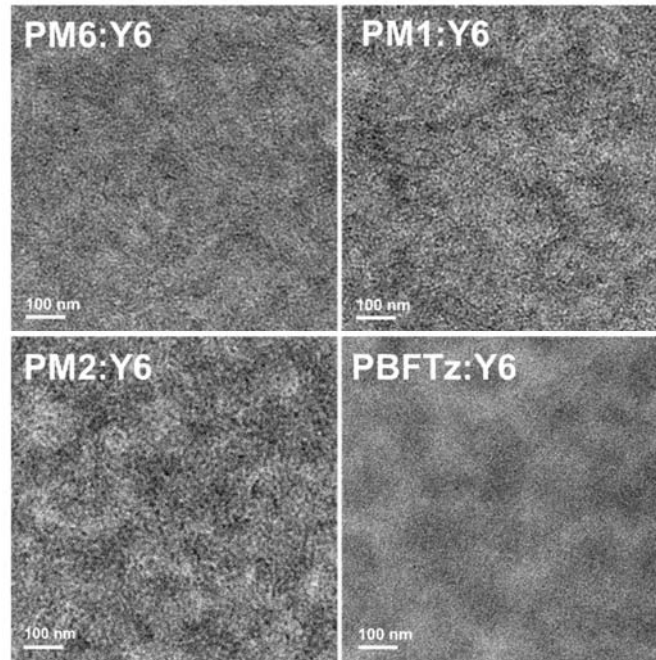

Figure S.14 | The TEM images of the polymer:Y6 blend films under the optimal conditions. Transmission electron microscopy (TEM) was performed using a Tecnai G2 F20 S-TWIN instrument at 200 kV accelerating voltage, where the polymer:Y6 films were prepared by the following processing techniques for the TEM measurement: The polymer:Y6 films were spin-cast on the ITO/PEDOT:PSS substrates, and then the resulting substrates with the polymer:Y6 films were submerged in deionized water to make these polymer:Y6 films float onto the water/air interface, and finally the floated polymer: Y6 films were picked up on unsupported 200 mesh copper grids.

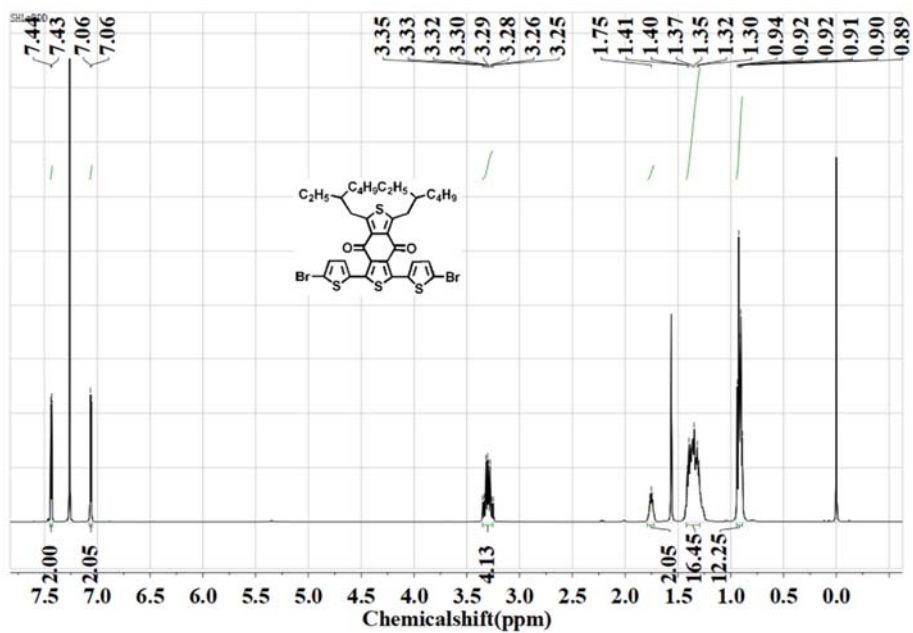

Figure S.15 |  $^1\text{H}$  NMR spectra of BDD unit.

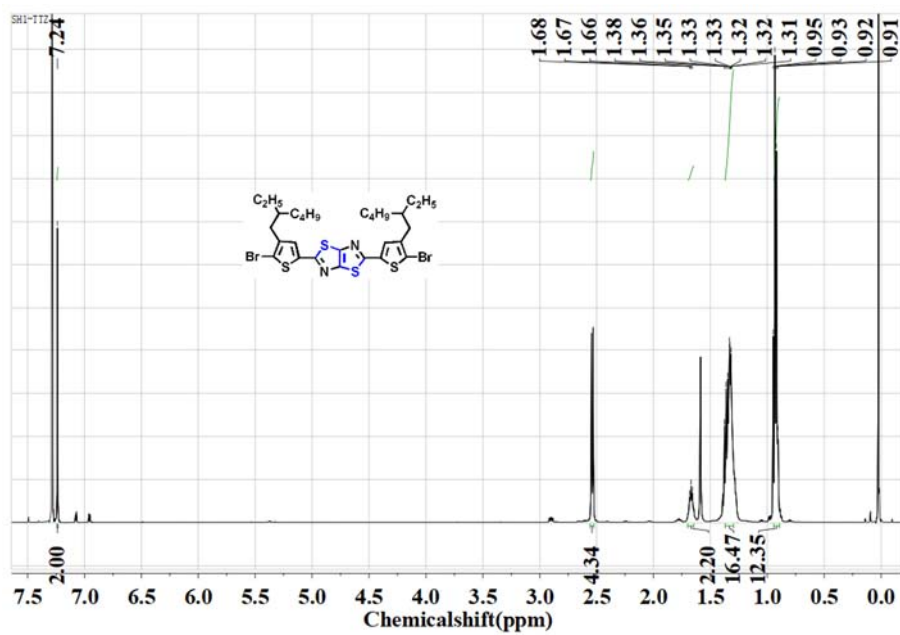

Figure S.16 |  $^1\text{H}$  NMR spectra of TTz unit.

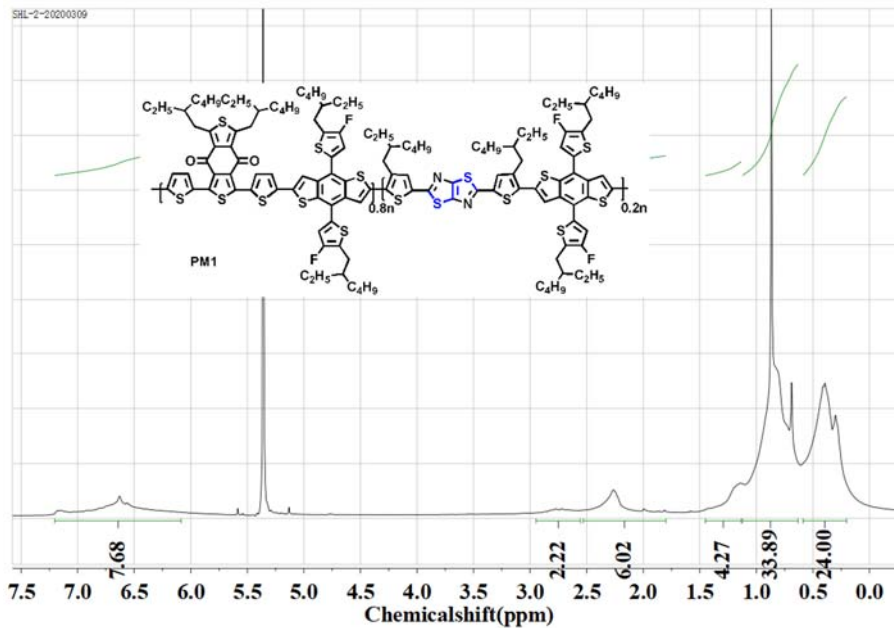

Figure S.17 | High-temperature (80°C) <sup>1</sup>H NMR spectra of PM1.

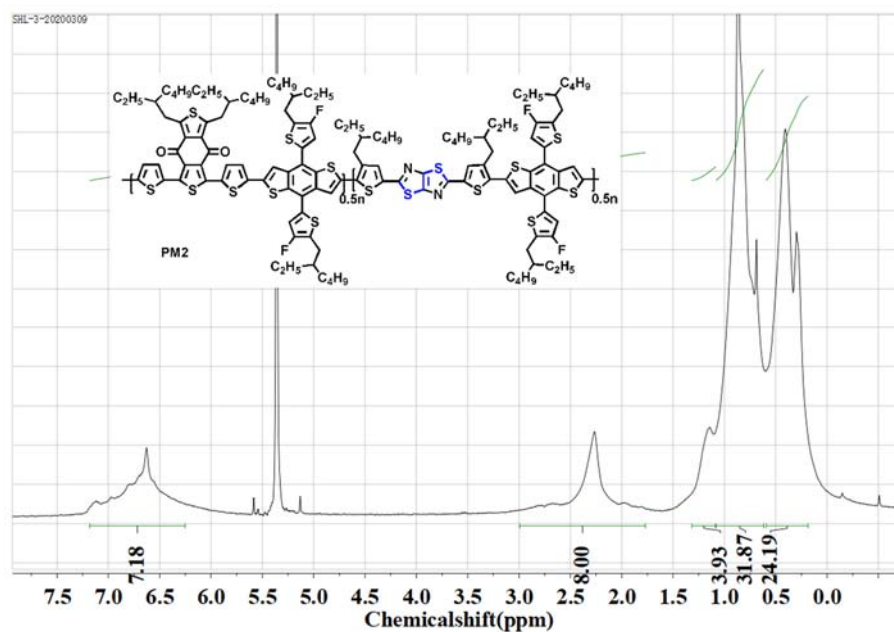

Figure S.18 | High-temperature (80°C) <sup>1</sup>H NMR spectra of PM2.

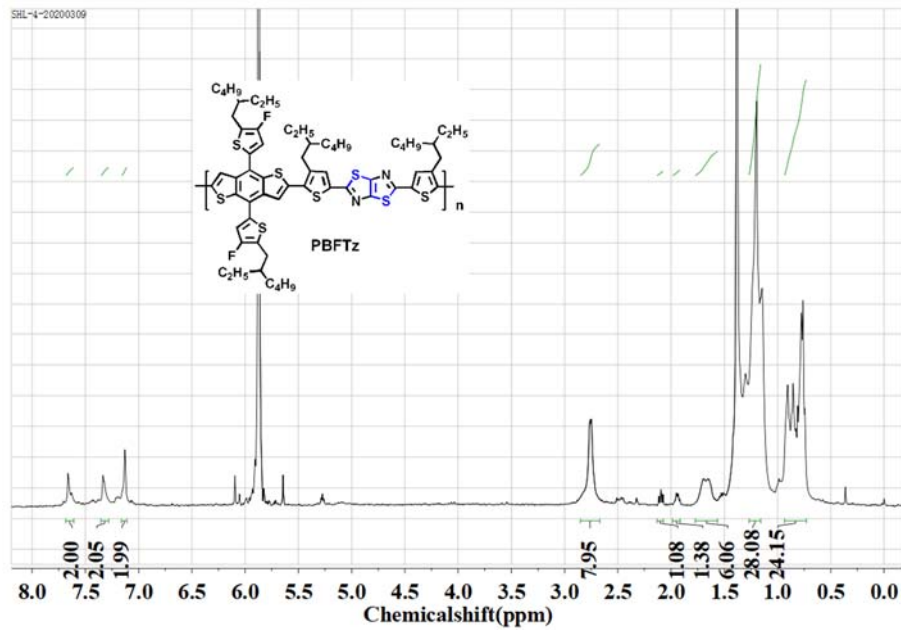

Figure S.19 | High-temperature (80°C)  $^1\text{H}$  NMR spectra of PBFTz.

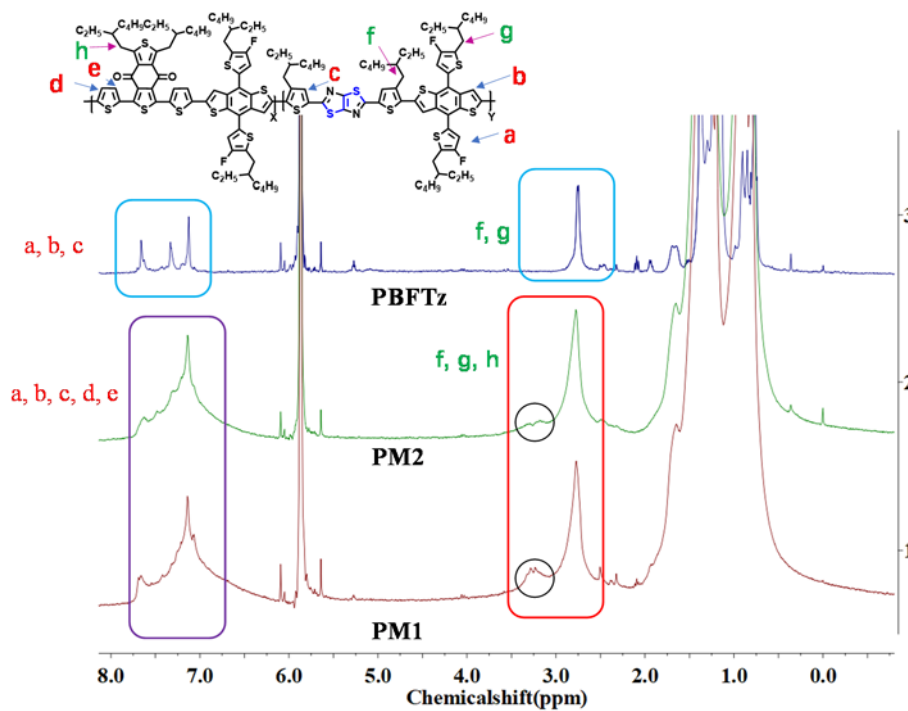

Figure S.20 | Comparison of  $^1\text{H}$  NMR spectra of PM1(X:Y=4:1), PM2 (X:Y=1:1) and PBFTz.



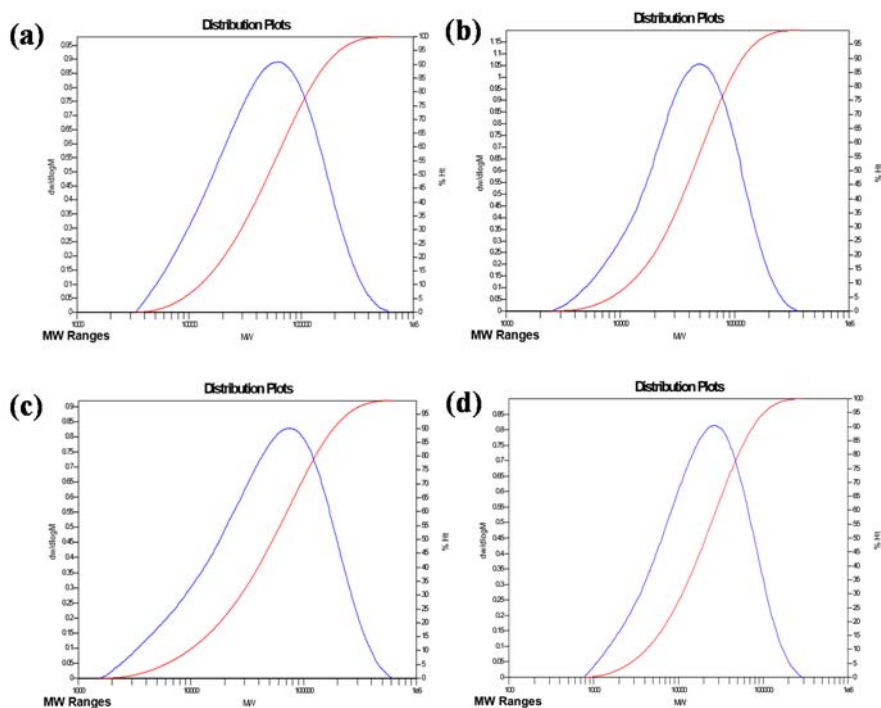

Figure S.21 | GPC traces of polymers: (a) PM6; (b) PM1; (c) PM2; (d) PBFTz. High temperature GPC with 1,2,4-trichlorobenzene as the eluent and polystyrene as a standard at 160 °C.

Table S1 | Basic properties of the polymers. The molecular weight of the polymer was measured by the GPC method with polystyrene as the standard and 1, 2, 4-trichlorobenzene as the solvent at 160 °C using Agilent Technologies PL-GPC220. Thermogravimetric analysis (TGA) was measured on TGA/DSC 3+ from METTLER TOLEDO using STARe Software at a heating rate of 10 °C min<sup>-1</sup> under a nitrogen atmosphere.

| Polymer      | $M_n$<br>[kDa] | PDI  | $E_g^{opt}$<br>[eV] <sup>a)</sup> | HOMO<br>[eV] | LUMO<br>[eV] | $\mu_n$ <sup>b)</sup><br>(cm <sup>2</sup> ·V <sup>-1</sup> ·S <sup>-1</sup> ) × 10 <sup>4</sup> |
|--------------|----------------|------|-----------------------------------|--------------|--------------|-------------------------------------------------------------------------------------------------|
| <b>PM6</b>   | 29.7           | 2.48 | 1.85                              | -5.48        | -3.59        | 6.70 [6.13±0.42]                                                                                |
| <b>PM1</b>   | 28.7           | 1.96 | 1.86                              | -5.50        | -3.59        | 7.18 [7.02±0.16]                                                                                |
| <b>PM2</b>   | 23.2           | 3.33 | 1.89                              | -5.60        | -3.63        | 4.80 [4.38±0.35]                                                                                |
| <b>PBFTz</b> | 10.1           | 3.19 | 1.94                              | -5.63        | -3.67        | 2.78 [2.41±0.29]                                                                                |

a) Calculated from the empirical formula:  $E_g^{opt} = 1240/\lambda_{onset}$ . b) the hole-only devices with the structure of ITO/PEDOT:PSS/polymer donor/MoO<sub>3</sub>/Ag and the statistical values in square bracket are the average  $\mu_n$  obtained from 4  $J^{1/2}$ - $V$  plots.

Table S2 | Photovoltaic performance parameters of the OSCs based on **PM1:Y6** at different additive, under the irradiation of AM 1.5G, 100 mW/cm<sup>2</sup>.

| D/A (w/w)  | CN       | $V_{oc}$<br>(V) | $J_{sc}$<br>(mA/cm <sup>2</sup> ) | FF<br>(%) | PCE (%)<br>Max./Avg. |
|------------|----------|-----------------|-----------------------------------|-----------|----------------------|
|            | W/O      | 0.87            | 25.5                              | 71.1      | 15.8/15.8            |
| <b>1:1</b> | 0.5% CN  | 0.87            | 25.8                              | 72.0      | 16.2/16.0            |
|            | 0.75% CN | 0.87            | 25.6                              | 72.8      | 16.4/16.3            |
|            | 1% CN    | 0.86            | 24.9                              | 74.6      | 16.0/15.7            |

The integral  $J_{sc}$  from the EQE curves. The Average parameters were calculated from more than 20 independent cells.

Table S3 | Photovoltaic performance parameters of the OSCs based on **PM1:Y6** at different D/A weight ratios with additive (0.75 vol %), under the irradiation of AM 1.5G, 100 mW/cm<sup>2</sup>.

| D/A (w/w) | $V_{oc}$ | $J_{sc}$              | FF   | PCE (%)   |
|-----------|----------|-----------------------|------|-----------|
|           | (V)      | (mA/cm <sup>2</sup> ) | (%)  | Max./Avg. |
| 1:1       | 0.87     | 25.6                  | 72.8 | 16.4/16.1 |
| 1:1.25    | 0.87     | 25.9                  | 78.1 | 17.6/17.3 |
| 1:1.5     | 0.87     | 25.7                  | 75.0 | 16.8/16.7 |

The integral  $J_{sc}$  from the EQE curves. The Average parameters were calculated from more than 20 independent cells.

Table S4 | Photovoltaic performance parameters of the OSCs with different polymers at D/A weight ratios (1:1.25, w/w) under the irradiation of AM 1.5G, 100 mW/cm<sup>2</sup>.

| Devices <sup>a)</sup> | $V_{oc}$ | $J_{sc}$              | FF  | Cal. $J_{sc}$ <sup>b)</sup> | PCE (%)                 |
|-----------------------|----------|-----------------------|-----|-----------------------------|-------------------------|
|                       | (V)      | (mA/cm <sup>2</sup> ) | (%) | (mA/cm <sup>2</sup> )       | Max./Avg. <sup>c)</sup> |
| PM6 :Y6               | 0.86     | 25.5                  | 70  | 25.2                        | 15.2 /15.0              |
| PM1 :Y6               | 0.87     | 25.3                  | 74  | 25.2                        | 16.1 /15.8              |
| PM2 :Y6               | 0.89     | 25.1                  | 63  | 24.7                        | 13.9 /13.6              |
| PBFTz:Y6              | 0.91     | 13.3                  | 57  | 12.6                        | 6.9 /6.7                |

a) As-cast device. b) The integral  $J_{sc}$  from the EQE curves. c) The Average parameters were calculated from more than 20 independent cells.

Table S5. | Summary of the molecular weight of PM1/PM6 and photovoltaic performance of PM1/PM6-based single junction cells with different batches.

| Polymers | PM1            |     |                                         | PM6            |     |                                         |
|----------|----------------|-----|-----------------------------------------|----------------|-----|-----------------------------------------|
| Batches  | $M_n$<br>[kDa] | PDI | PCE <sub>max</sub> <sup>a)</sup><br>[%] | $M_n$<br>[kDa] | PDI | PCE <sub>max</sub> <sup>a)</sup><br>[%] |
| Batch1   | 21.2           | 2.2 | 17.1 [16.8]                             | 12.2           | 3.5 | 15.2 [14.9]                             |
| Batch2   | 23.5           | 2.2 | 17.1 [16.9]                             | 14.8           | 3.6 | 15.3 [15.1]                             |
| Batch3   | 24.1           | 2.2 | 17.3 [17.0]                             | 21.4           | 3.0 | 16.5 [16.3]                             |
| Batch4   | 25.6           | 2.3 | 17.2 [17.0]                             | 21.5           | 2.5 | 16.3 [16.2]                             |
| Batch5   | 26.7           | 2.1 | 17.5 [17.3]                             | 26.2           | 2.2 | 15.7 [15.6]                             |
| Batch6   | 28.7           | 2.0 | 17.6 [17.3]                             | 29.7           | 2.5 | 15.8 [15.6]                             |
| Batch7   | 31.5           | 2.3 | 17.0 [16.8]                             | 38.9           | 2.1 | 15.5 [15.2]                             |
| Batch8   | 33.0           | 2.3 | 17.4 [17.0]                             | 63.1           | 2.1 | 14.7 [14.4]                             |

a) The PSCs based on polymer:Y6 (1:1.25) with 0.75% CN; the statistical values in square bracket are the average PCE obtained from 10 devices.

Table S6 | Optimal photovoltaic performance parameters of the OSCs with a device architecture of Glass/ITO/PEDOT:PSS/Active Layer/PFN-Br/Ag under the irradiation of AM 1.5G, 100 mW/cm<sup>2</sup>.

| Active layer         | $V_{oc}$<br>(V) | $J_{sc}$<br>(mA/cm <sup>2</sup> ) | FF<br>(%) | PCE <sup>b)</sup><br>(%) |
|----------------------|-----------------|-----------------------------------|-----------|--------------------------|
| PM1:Y6               | 0.87            | 25.9                              | 78        | 17.6 [17.2±0.2]          |
| PM1:N3 <sup>a)</sup> | 0.88            | 25.8                              | 75        | 17.0 [16.8±0.2]          |
| PM6:N3 <sup>c)</sup> | 0.84            | 25.8                              | 74        | 16.0 [15.8±0.2]          |

a) 0.75% CN, 100°C+10min. b) The statistical values in square bracket are the average PCE obtained from 15 devices. c) Ref [1]

Table S7 | The surface energy and Flory–Huggins interaction parameter ( $\chi$ ) of the donor and acceptor materials.

| Donor | $\gamma_{\text{donor}}$<br>(mJ/m <sup>2</sup> ) | Acceptor | $\gamma_{\text{acceptor}}$<br>(mJ/m <sup>2</sup> ) | $\chi/$<br>$K(\gamma_D^2 - \gamma_A^2)^2$ | FF |
|-------|-------------------------------------------------|----------|----------------------------------------------------|-------------------------------------------|----|
| PM6   | 38.12                                           | Y6       | 43.82                                              | 0.199K                                    | 72 |
| PM1   | 37.31                                           | Y6       | 43.82                                              | 0.262K                                    | 78 |
| PM2   | 36.12                                           | Y6       | 43.82                                              | 0.372K                                    | 69 |
| PBFTz | 29.64                                           | Y6       | 43.82                                              | 1.382K                                    | 59 |

Table S8 | Summary of the crystal coherence length and *d*-spacing of neat polymer films.

|       |              | LOCATION<br>(Å <sup>-1</sup> ) | FWHM<br>(Å <sup>-1</sup> ) | CL<br>(Å) | d-spacing<br>(Å) |
|-------|--------------|--------------------------------|----------------------------|-----------|------------------|
| PM6   | OOP<br>(010) | 1.66                           | 0.289                      | 19.60     | 3.78             |
| PM1   |              | 1.66                           | 0.262                      | 21.61     | 3.78             |
| PM2   |              | 1.67                           | 0.315                      | 17.95     | 3.76             |
| PBFTz |              | 1.68                           | 0.329                      | 17.20     | 3.74             |
| PM6   | IP<br>(100)  | 0.29                           | 0.095                      | 59.54     | 21.88            |
| PM1   |              | 0.29                           | 0.112                      | 50.58     | 21.68            |
| PM2   |              | 0.30                           | 0.117                      | 48.53     | 20.76            |
| PBFTz |              | 0.31                           | 0.083                      | 68.47     | 20.13            |

Table S9 | Summary of the crystal coherence length and *d*-spacing of blend films

|                 |              | LOCATION<br>(Å <sup>-1</sup> ) | FWHM<br>(Å <sup>-1</sup> ) | CL<br>(Å) | d-spacing<br>(Å) | Hight  |
|-----------------|--------------|--------------------------------|----------------------------|-----------|------------------|--------|
| <b>PM6:Y6</b>   | OOP<br>(010) | 1.72                           | 0.214                      | 26.48     | 3.65             | 307.24 |
| <b>PM1:Y6</b>   |              | 1.72                           | 0.218                      | 26.00     | 3.65             | 408.48 |
| <b>PM2:Y6</b>   |              | 1.72                           | 0.235                      | 24.04     | 3.65             | 366.87 |
| <b>PBFTz:Y6</b> |              | 1.73                           | 0.216                      | 26.11     | 3.64             | 318.24 |
| <b>Y6</b>       |              | 1.73                           | 0.210                      | 26.87     | 3.63             |        |
| <b>PM6:Y6</b>   | IP<br>(100)  | 0.29                           | 0.078                      | 72.70     | 21.67            | 663.52 |
| <b>PM1:Y6</b>   |              | 0.30                           | 0.073                      | 77.03     | 21.65            | 796.6  |
| <b>PM2:Y6</b>   |              | 0.30                           | 0.078                      | 72.07     | 21.28            | 581.93 |
| <b>PBFTz:Y6</b> |              | 0.31                           | 0.059                      | 95.95     | 21.07            | 590.28 |
| <b>Y6</b>       |              | 0.27                           | 0.093                      | 60.61     | 20.04            |        |

Table S10 | Electron and hole SCLC mobilities of blend films with 0.75% CN treatment.

| Blend <sup>a)</sup> | $\mu_h$ (cm <sup>2</sup> ·V <sup>-1</sup> ·S <sup>-1</sup> ) × 10 <sup>4</sup> | $\mu_e$ (cm <sup>2</sup> ·V <sup>-1</sup> ·S <sup>-1</sup> ) × 10 <sup>4</sup> | $\mu_e/\mu_h$ |
|---------------------|--------------------------------------------------------------------------------|--------------------------------------------------------------------------------|---------------|
| PM6:Y6              | 3.68 [3.42±0.29]                                                               | 5.16 [4.63±0.51]                                                               | 1.40          |
| PM1:Y6              | 5.02 [4.69±0.53]                                                               | 5.91 [5.48±0.41]                                                               | 1.18          |
| PM2:Y6              | 3.51 [3.28±0.25]                                                               | 4.62 [4.29±0.25]                                                               | 1.32          |
| PBFTz:Y6            | 1.38 [1.24±0.13]                                                               | 4.19 [3.82±0.55]                                                               | 3.02          |

a) the hole-only devices with the structure of ITO/PEDOT:PSS/polymer donor/MoO<sub>3</sub>/Ag and the electron-only devices with the structure of ITO/ZnO/active layer/PFN-Br/Ag according to the SCLC model. b) the statistical values in square bracket are the average mobilities obtained from 4  $J^{1/2}$ - $V$  plots.

### Supplementary Note:

#### Synthesis of PM6:

BDT-TF monomer (0.3 mmol, 282 mg) and bromide monomer of BDD (0.3 mmol, 230 mg) were dissolved in toluene (10 mL). Pd(PPh<sub>3</sub>)<sub>4</sub> (15 mg) was added into the mixture after being flushed with argon for ten minutes. Then, the reaction mixture was purged with argon for another 15 min. The reactions of eight batches of PM6 were stirred at 110°C for about 6 h. The polymers were precipitated in methanol (100 mL) and filtered. The dried precipitates were purified by flash silica gel column chromatography by using chloroform as eluent. The polymer was then precipitated in methanol (60 mL) and dried under vacuum for 24 h before use.

#### Synthesis of PM1:

BDT-TF monomer (0.3 mmol, 282 mg) and bromide monomers of BDD (0.24 mmol, 184 mg) and TTz (0.06 mmol, 41 mg) were dissolved in toluene (10 mL). Pd(PPh<sub>3</sub>)<sub>4</sub> (15 mg) was added into the mixture after being flushed with argon for ten minutes. Then, the reaction mixture was purged with argon for another 15 min. The reactions of eight batches of PM1 were stirred at 110°C for about 6 h. The polymers were precipitated in methanol (100 mL) and filtered. The dried precipitates were purified by flash silica gel column chromatography by using chloroform as eluent. The polymer was then precipitated in methanol (60 mL) and dried under vacuum for 24 h before use. <sup>1</sup>H NMR (400 MHz, CD<sub>2</sub>Cl<sub>2</sub>) δ 7.20-6.08 (m, 7.68H), 2.75 (d, 2H), 2.53-1.80 (m, 6H), 1.14 (s, 4H), 0.78 (d, 34H), 0.59-0.20 (m, 24H). Anal. calcd for C<sub>66.8</sub>H<sub>72.4</sub>F<sub>2</sub>N<sub>0.4</sub>O<sub>1.6</sub>S<sub>8</sub>: C=66.84%, H=6.04%, N=0.47%, S=21.35%. Found: C= 67.01%, H= 6.31%, N=0.39%, S=21.57%.

#### Synthesis of PM2:

BDT-TF monomer (0.3 mmol, 282 mg) and bromide monomers of BDD (0.15 mmol, 115 mg) and TTz (0.15 mmol, 103 mg) were dissolved in toluene (10 mL). Pd(PPh<sub>3</sub>)<sub>4</sub> (15 mg) was added into the mixture after being flushed with argon for ten minutes. Then, the reaction mixture was purged with argon for another 15 min. The reaction was stirred at 110 °C for 7 h. The polymers were precipitated in methanol (100 mL) and

filtrated. The dried precipitates were purified by flash silica gel column chromatography by using chloroform as eluent. The polymer was then precipitated in methanol (60 mL) and dried under vacuum for 24 h before use. The yields are around 75%.  $^1\text{H}$  NMR (400 MHz,  $\text{CD}_2\text{Cl}_2$ )  $\delta$  7.18-6.25 (m, 7H), 2.99-1.77 (m, 8H), 1.11 (d, 4H), 0.78 (d, 32H), 0.35 (d, 24H). Anal. calcd for  $\text{C}_{65}\text{H}_{75}\text{F}_2\text{N}_1\text{O}_1\text{S}_8$ : C=66.15%, H=6.36%, N=1.19%, S=21.71%. Found: C=65.95%, H=6.29%, N=1.05%, S=21.77%.

#### Synthesis of PBFTz:

BDT-TF monomer (0.3 mmol, 282 mg) and TTz (0.3 mmol, 206 mg) monomer were dissolved in toluene (10 mL).  $\text{Pd}(\text{PPh}_3)_4$  (15 mg) was added into the mixture after being flushed with argon for ten minutes. Then, the reaction mixture was purged with argon for another 15 min. The reaction was stirred at 110 °C for 4 h. The polymers were precipitated in methanol (100 mL) and filtrated. The dried precipitates were purified by flash silica gel column chromatography by using chlorobenzene as eluent. The polymer was then precipitated in methanol (60 mL) and dried under vacuum for 24 h before use.  $^1\text{H}$  NMR (400 MHz,  $\text{CD}_2\text{Cl}_2$ )  $\delta$  7.65 (d, 2H), 7.34 (s, 2H), 7.13 (s, 2H), 2.76 (d, 8H), 2.13-2.07 (m, 1H), 1.94 (d, 1H), 1.67 (d, 6H), 1.18 (d, 28H), 0.93-0.73 (m, 24H). Anal. calcd for  $\text{C}_{62}\text{H}_{74}\text{F}_2\text{N}_2\text{S}_8$ : C=65.26%, H=6.49%, N=2.46%, S=22.46%. Found: C=66.72%, H=6.99%, N=2.13%, S=20.29%.

#### Supplementary references

- 1 Jiang, K. *et al.* Alkyl chain tuning of small molecule acceptors for efficient organic solar cells. *Joule* **3**, 1-14 (2019).
